# Supplementary material
Source: PubMed Central journal article supplement (PMC7610831)
Supplement: EMS120873-supplement-Source_Data_Fig1.pdf [file EMS120873-supplement-Source_Data_Fig1.pdf]

| Year | 2000 | 2001 | 2002 | 2003 | 2004 | 2005 |
|------|------|------|------|------|------|------|
| 1    | 0    | 0    | 0    | 0    | 0    | 0    |
| 2    | 0    | 0    | 0    | 0    | 0    | 0    |
| 3    | 0    | 0    | 0    | 0    | 0    | 0    |
| 4    | 0    | 0    | 0    | 0    | 0    | 0    |
| 5    | 0    | 0    | 0    | 0    | 0    | 0    |
| 6    | 0    | 0    | 0    | 0    | 0    | 0    |
| 7    | 0    | 0    | 0    | 0    | 0    | 0    |
| 8    | 0    | 0    | 0    | 0    | 0    | 0    |
| 9    | 0    | 0    | 0    | 0    | 0    | 0    |
| 10   | 0    | 0    | 0    | 0    | 0    | 0    |
| 11   | 0    | 0    | 0    | 0    | 0    | 0    |
| 12   | 0    | 0    | 0    | 0    | 0    | 0    |
| 13   | 0    | 0    | 0    | 0    | 0    | 0    |
| 14   | 0    | 0    | 0    | 0    | 0    | 0    |
| 15   | 0    | 0    | 0    | 0    | 0    | 0    |
| 16   | 0    | 0    | 0    | 0    | 0    | 0    |
| 17   | 0    | 0    | 0    | 0    | 0    | 0    |
| 18   | 0    | 0    | 0    | 0    | 0    | 0    |
| 19   | 0    | 0    | 0    | 0    | 0    | 0    |
| 20   | 0    | 0    | 0    | 0    | 0    | 0    |
| 21   | 0    | 0    | 0    | 0    | 0    | 0    |
| 22   | 0    | 0    | 0    | 0    | 0    | 0    |
| 23   | 0    | 0    | 0    | 0    | 0    | 0    |
| 24   | 0    | 0    | 0    | 0    | 0    | 0    |
| 25   | 0    | 0    | 0    | 0    | 0    | 0    |
| 26   | 0    | 0    | 0    | 0    | 0    | 0    |
| 27   | 0    | 0    | 0    | 0    | 0    | 0    |
| 28   | 0    | 0    | 0    | 0    | 0    | 0    |
| 29   | 0    | 0    | 0    | 0    | 0    | 0    |
| 30   | 0    | 0    | 0    | 0    | 0    | 0    |
| 31   | 0    | 0    | 0    | 0    | 0    | 0    |
| 32   | 0    | 0    | 0    | 0    | 0    | 0    |
| 33   | 0    | 0    | 0    | 0    | 0    | 0    |
| 34   | 0    | 0    | 0    | 0    | 0    | 0    |
| 35   | 0    | 0    | 0    | 0    | 0    | 0    |
| 36   | 0    | 0    | 0    | 0    | 0    | 0    |
| 37   | 0    | 0    | 0    | 0    | 0    | 0    |
| 38   | 0    | 0    | 0    | 0    | 0    | 0    |
| 39   | 0    | 0    | 0    | 0    | 0    | 0    |
| 40   | 0    | 0    | 0    | 0    | 0    | 0    |
| 41   | 0    | 0    | 0    | 0    | 0    | 0    |
| 42   | 0    | 0    | 0    | 0    | 0    | 0    |
| 43   | 0    | 0    | 0    | 0    | 0    | 0    |
| 44   | 0    | 0    | 0    | 0    | 0    | 0    |
| 45   | 0    | 0    | 0    | 0    | 0    | 0    |
| 46   | 0    | 0    | 0    | 0    | 0    | 0    |
| 47   | 0    | 0    | 0    | 0    | 0    | 0    |
| 48   | 0    | 0    | 0    | 0    | 0    | 0    |
| 49   | 0    | 0    | 0    | 0    | 0    | 0    |
| 50   | 0    | 0    | 0    | 0    | 0    | 0    |
| 51   | 0    | 0    | 0    | 0    | 0    | 0    |
| 52   | 0    | 0    | 0    | 0    | 0    | 0    |
| 53   | 0    | 0    | 0    | 0    | 0    | 0    |
| 54   | 0    | 0    | 0    | 0    | 0    | 0    |
| 55   | 0    | 0    | 0    | 0    | 0    | 0    |
| 56   | 0    | 0    | 0    | 0    | 0    | 0    |
| 57   | 0    | 0    | 0    | 0    | 0    | 0    |
| 58   | 0    | 0    | 0    | 0    | 0    | 0    |
| 59   | 0    | 0    | 0    | 0    | 0    | 0    |
| 60   | 0    | 0    | 0    | 0    | 0    | 0    |
| 61   | 0    | 0    | 0    | 0    | 0    | 0    |
| 62   | 0    | 0    | 0    | 0    | 0    | 0    |
| 63   | 0    | 0    | 0    | 0    | 0    | 0    |
| 64   | 0    | 0    | 0    | 0    | 0    | 0    |
| 65   | 0    | 0    | 0    | 0    | 0    | 0    |
| 66   | 0    | 0    | 0    | 0    | 0    | 0    |
| 67   | 0    | 0    | 0    | 0    | 0    | 0    |
| 68   | 0    | 0    | 0    | 0    | 0    | 0    |
| 69   | 0    | 0    | 0    | 0    | 0    | 0    |
| 70   | 0    | 0    | 0    | 0    | 0    | 0    |
| 71   | 0    | 0    | 0    | 0    | 0    | 0    |
| 72   | 0    | 0    | 0    | 0    | 0    | 0    |
| 73   | 0    | 0    | 0    | 0    | 0    | 0    |
| 74   | 0    | 0    | 0    | 0    | 0    | 0    |
| 75   | 0    | 0    | 0    | 0    | 0    | 0    |
| 76   | 0    | 0    | 0    | 0    | 0    | 0    |
| 77   | 0    | 0    | 0    | 0    | 0    | 0    |
| 78   | 0    | 0    | 0    | 0    | 0    | 0    |
| 79   | 0    | 0    | 0    | 0    | 0    | 0    |
| 80   | 0    | 0    | 0    | 0    | 0    | 0    |
| 81   | 0    | 0    | 0    | 0    | 0    | 0    |
| 82   | 0    | 0    | 0    | 0    | 0    | 0    |
| 83   | 0    | 0    | 0    | 0    | 0    | 0    |
| 84   | 0    | 0    | 0    | 0    | 0    | 0    |
| 85   | 0    | 0    | 0    | 0    | 0    | 0    |
| 86   | 0    | 0    | 0    | 0    | 0    | 0    |
| 87   | 0    | 0    | 0    | 0    | 0    | 0    |
| 88   | 0    | 0    | 0    | 0    | 0    | 0    |
| 89   | 0    | 0    | 0    | 0    | 0    | 0    |
| 90   | 0    | 0    | 0    | 0    | 0    | 0    |
| 91   | 0    | 0    | 0    | 0    | 0    | 0    |
| 92   | 0    | 0    | 0    | 0    | 0    | 0    |
| 93   | 0    | 0    | 0    | 0    | 0    | 0    |
| 94   | 0    | 0    | 0    | 0    | 0    | 0    |
| 95   | 0    | 0    | 0    | 0    | 0    | 0    |
| 96   | 0    | 0    | 0    | 0    | 0    | 0    |
| 97   | 0    | 0    | 0    | 0    | 0    | 0    |
| 98   | 0    | 0    | 0    | 0    | 0    | 0    |
| 99   | 0    | 0    | 0    | 0    | 0    | 0    |
| 100  | 0    | 0    | 0    | 0    | 0    | 0    |
