# Supplementary material
Source: PubMed Central journal article supplement (PMC7610831)

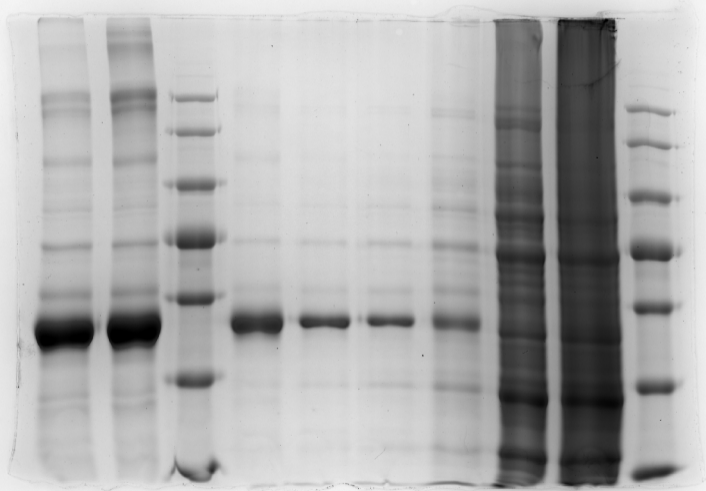

Supplement: EMS120873-supplement-Source_Data_Extended_Fig1.pdf [file EMS120873-supplement-Source_Data_Extended_Fig1.pdf]

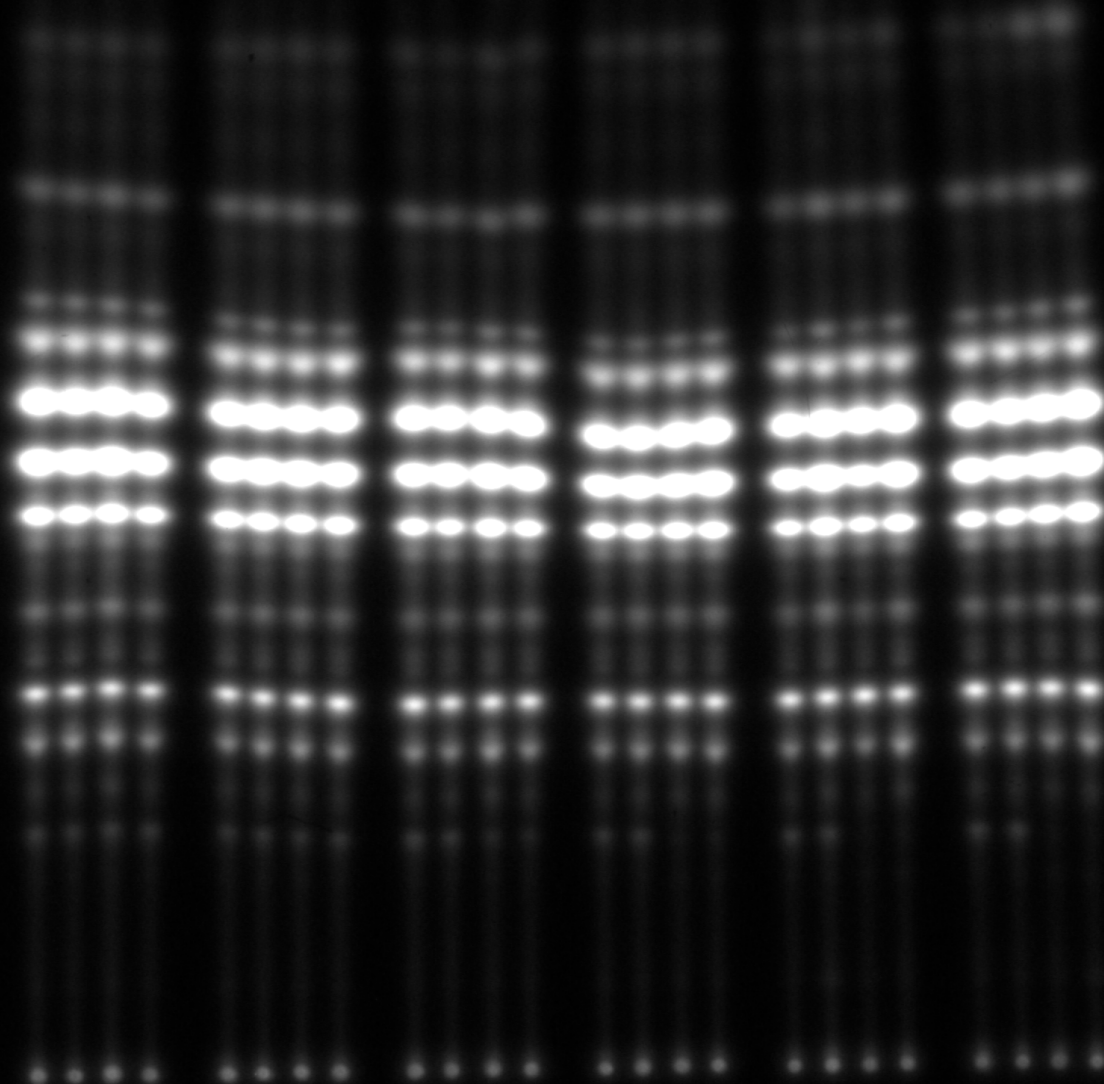

Supplement: EMS120873-supplement-Source_Data_Fig2.pdf [file EMS120873-supplement-Source_Data_Fig2.pdf]
